# Supplementary material for: Chemokine Receptor Expression on T Cells Is Modulated by CAFs and Chemokines Affect the Spatial Distribution of T Cells in Pancreatic Tumors
Source: MDPI journal article supplement (doi:10.3390/cancers14153826), 2022-08-06
Supplement: s1 [file s1]

**Supplementary Table S1**

| Markers                     | Fluorochrome | Clone  | Company   | Catalogue # | Staining |
|-----------------------------|--------------|--------|-----------|-------------|----------|
| <b>Lymphocyte's markers</b> |              |        |           |             |          |
| CD3                         | BV510        | UCHT1  | BD        | 563109      | EC       |
| CD3                         | BV785        | UCHT1  | Biolegend | 300472      | EC       |
| CD4                         | A700         | RPA-T4 | BD        | 557922      | EC       |
| CD8                         | APC-Cy7      | SK1    | BD        | 557834      | EC       |
| CXCR4                       | BV421        | 12G5   | BD        | 562448      | EC       |
| CXCR3                       | APC          | 1C6    | BD        | 550967      | EC       |
| CCR5                        | PECF594      | 2D7    | BD        | 562456      | EC       |
| 7AAD                        | 7AAD         | -      | BD        | 559928      |          |

**Antibodies used to characterize lymphocytes in flow cytometer.** Abbreviations; **CD**, Cluster of differentiation, **CXCR**, Chemokine (C-X-C) motif receptor, **CCR**, Chemokine (C-C) motif receptor. Companies; **BD**, BD Biosciences (Franklin Lakes, NJ, USA), **BioLegend**, Biolegend (San Diego, CA, USA). Stainings; **EC**, Extracellular.

## Supplementary Figure S1

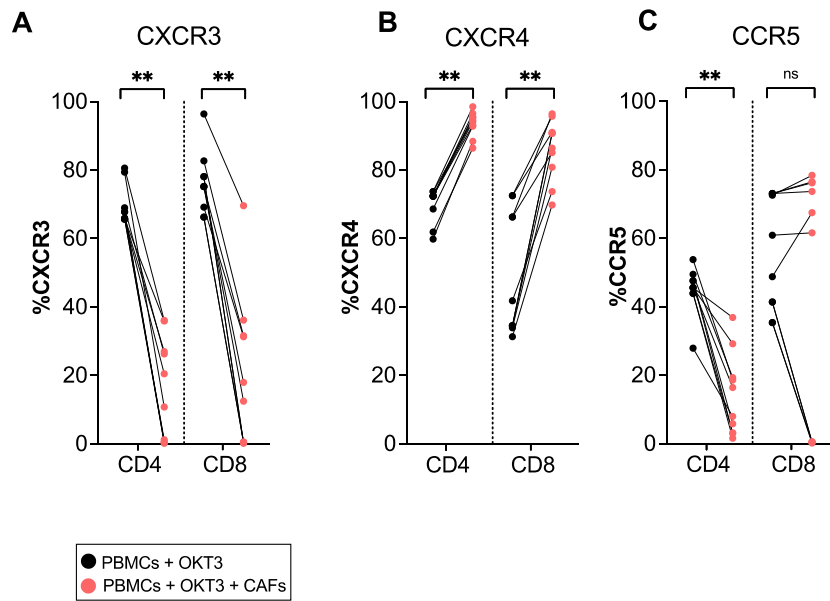

**Supplementary Figure S1. CAFs modulate chemokine receptor expression on activated T cells.** PBMCs were co-cultured with the absence (black dots) or presence (light red dots) of CAFs and activated with OKT3 (25ng/ml) for 5 days. Expression of **(A)** CXCR3, **(B)** CXCR4, and **(C)** CCR5 in CD4<sup>+</sup> and CD8<sup>+</sup> T cells. Dots and lines show paired samples. Wilcoxon signed-rank test was used to detect statistically significant differences between paired samples. ns, not significant, \*\* $p < 0.01$ .

## Supplementary Figure S2

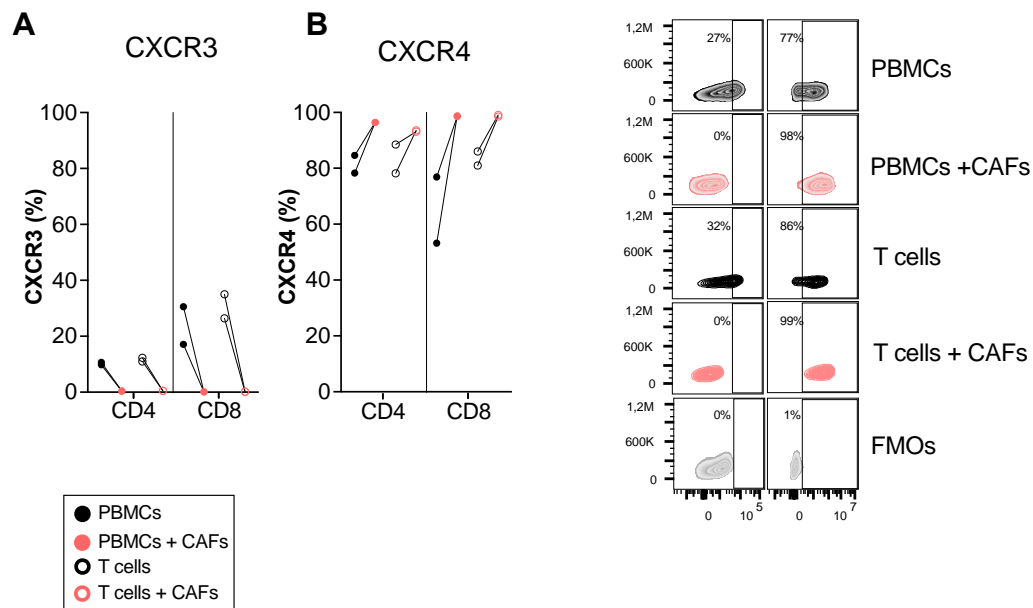

**Supplementary Figure S2. CAFs modulate chemokine receptor expression on isolated T cells.** PBMCs (filled circles) or isolated T cells (CD3<sup>+</sup>) (open circles) were co-cultured in the absence (black) or presence (light red) of CAFs. Expression of **(A)** CXCR3 and **(B)** CXCR4. (right) Representative zebra plots showing the gating strategy in **(A-B)**.

**Supplementary Figure S3**

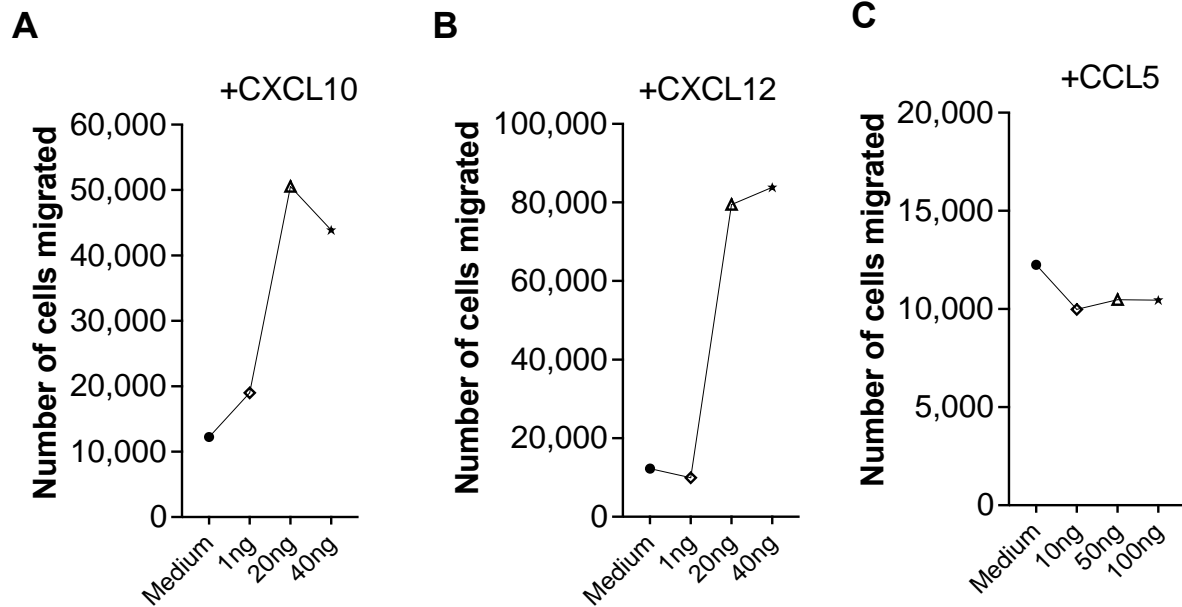

**Supplementary Figure S3. T cells migrate towards CXCL10, CXCL12 but not CCL5.** Number of migrated CD3<sup>+</sup> T cells towards (A) CCL5 (10ng, 50ng, 100ng) (B) CXCL10 (1ng, 20ng, 40ng) and (C) CXCL12 (1ng, 20ng, 40ng).

## Supplementary Figure S4

### Total stroma

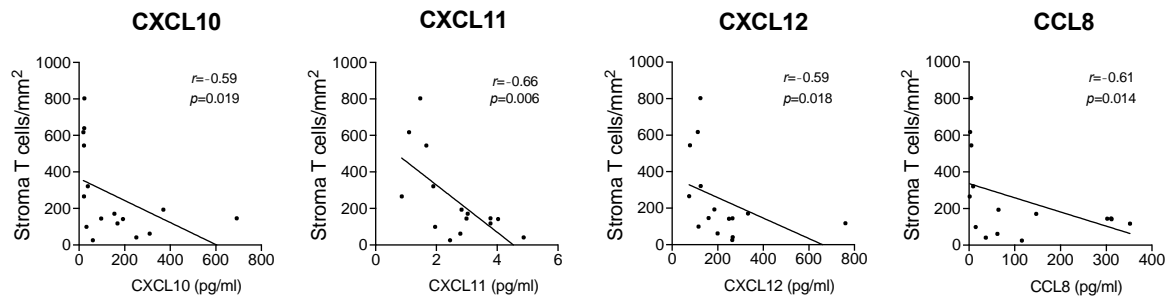

**Supplementary Figure S4. Correlations between T cell number and chemokines.** Correlations between the numbers of CD8<sup>+</sup> T cells in tumor/stroma areas and chemokine secretion. Spearman  $r$  and  $p$ -values are presented. ns, not significant. \* $p < 0.05$ , \*\* $p < 0.01$ , \*\*\* $p < 0.001$ .

## Supplementary Figure S5

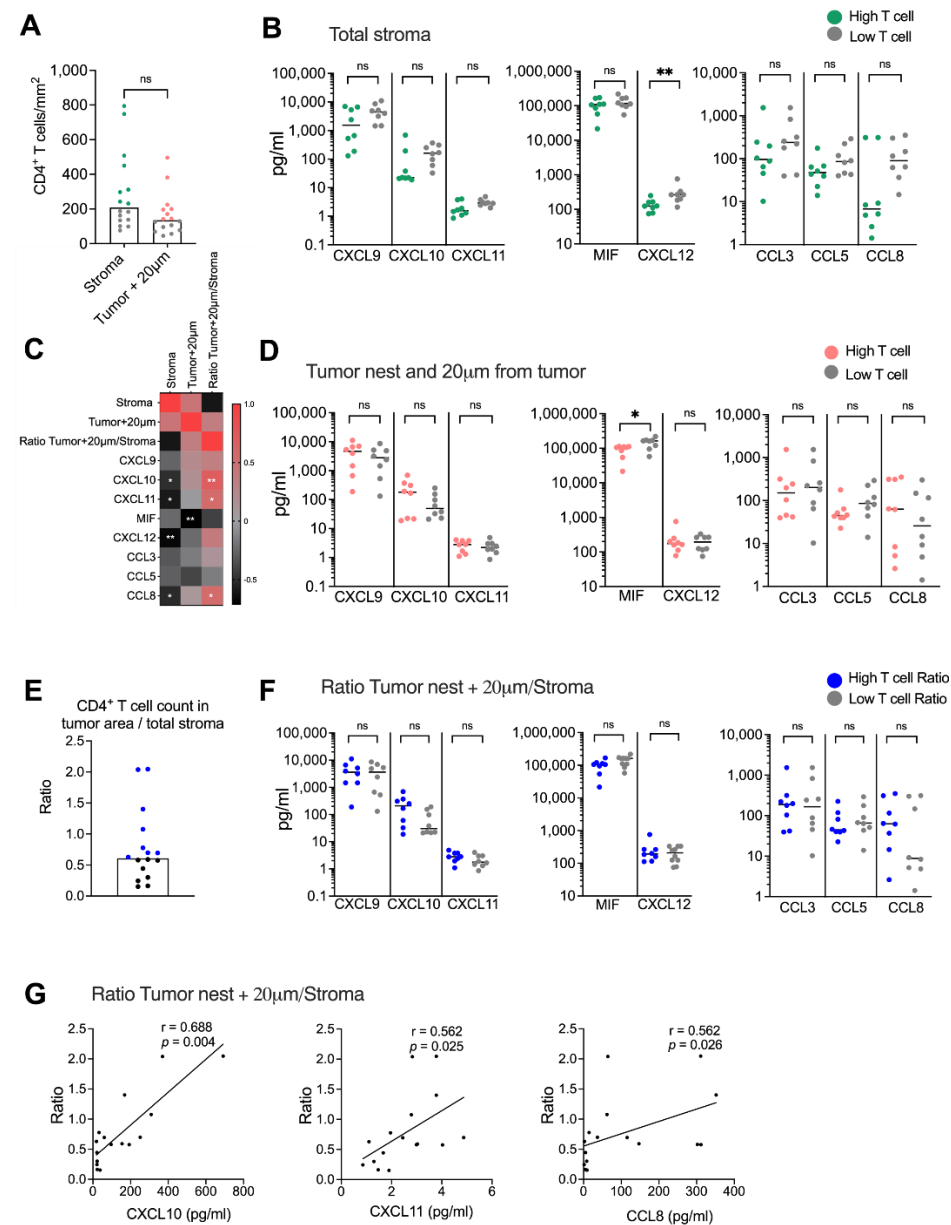

**Supplementary Figure S5. Spatial localization of CD4<sup>+</sup> T cells.** (A) Number of CD4<sup>+</sup> T cells in stroma and in the tumor nest + 20 μm from the tumor nests. Green and red dots show the donors with CD4<sup>+</sup> T cells numbers above the median and grey dots show the donors with CD4<sup>+</sup> T cells numbers below the median. (B) Secretion of chemokines in tissues with high CD4<sup>+</sup> T cell numbers (green) and low CD4<sup>+</sup> T cell numbers (grey). (C) Heat map correlation matrix showing positive (red) and negative (black) correlations between number of CD4<sup>+</sup> T cells and chemokine secretion. (D) Secretion of chemokines in tissues with high CD4<sup>+</sup> T cells numbers (red) and low CD4<sup>+</sup> T cells numbers (grey) in the tumor nests + 20 μm from the tumor nests. (E) Ratio between CD4<sup>+</sup> T cells in tumor nest + 20 μm from them. (F) Secretion of chemokines in tissues with high CD4<sup>+</sup> T cell ratio (blue) and low CD4<sup>+</sup> T cells ratio (grey). (G) Correlations between ratio of CD4<sup>+</sup> T cells in tumoral areas (tumor nest + 20μm from tumor/total stroma) and CXCL10, CXCL11 and CCL8. Mann-Whitney test was used to detect statistically significant differences between unpaired samples. Correlations were evaluated by using Spearman's correlation test. Spearman  $r$  and  $p$ -values are presented. ns, not significant. \* $p$  < 0.05, \*\* $p$  < 0.01, \*\*\* $p$  < 0.001.
